# Supplementary material for: Welded Carbon Nanotube–Graphene Hybrids with Tunable Strain Sensing Behavior for Wide-Range Bio-Signal Monitoring
Source: MDPI journal article supplement (doi:10.3390/polym16020238), 2024-01-15
Supplement: s1 [file s1]

## Supporting Information

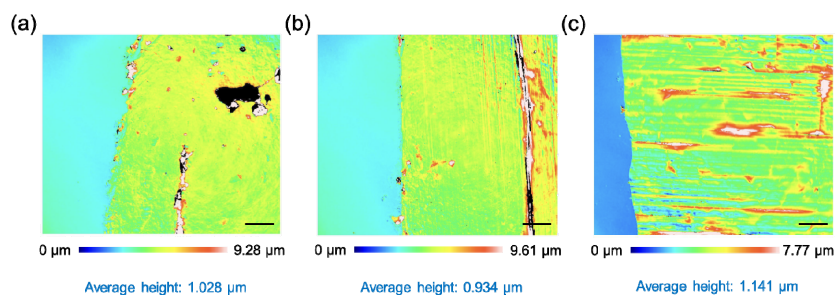

**Figure S1.** The height profile for the film before annealing (a), after 500 °C annealing (b) and after 1000 °C annealing (c) transferred on silicon wafer at the film-substrate interface. The average height of the film is automatically calculated by the software.

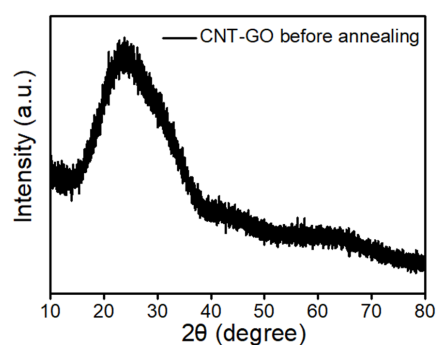

**Figure S2.** The XRD patterned of CNT-GO hybrid before annealing (magnified view of Figure 1e).

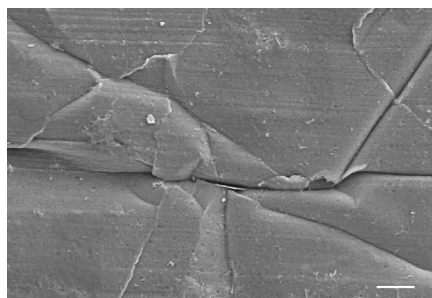

**Figure S3.** The magnified view of the hybrid after 500 °C annealing to reveal the distribution of cracks. Scale bar: 5 $\mu\text{m}$ .

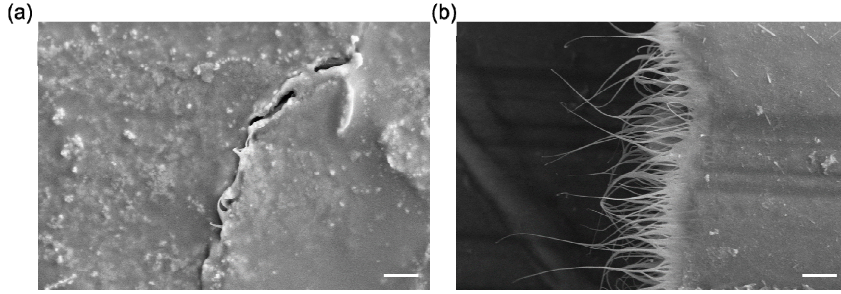

**Figure S4.** The morphology of the fracture surface for the hybrid without (a) and with annealing. Scale bar for (a): 2  $\mu\text{m}$ . Scale bar for (b): 1  $\mu\text{m}$ .

|             | No annealing | 500 °C annealing | 1000 °C annealing |
|-------------|--------------|------------------|-------------------|
| CNT:GO=45:1 | 82.1         | 180.4            | 326.1             |
| CNT:GO=3:1  | 22.81        | 48.16            | 176.8             |
| CNT:GO=1:3  | 13.12        | 29.04            | 97.98             |
| CNT:GO=1:15 | 2.92         | 7.204            | 19.12             |
| CNT:GO=1:45 | 1.67         | 3.788            | 6.635             |

**Table S1.** The gauge factor value of the CNT/graphene film with varied initial CNT:GO ratio and different annealing process.

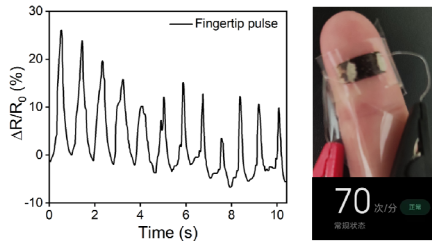

**Figure S5.** The recording of fingertip pulse by the sensor (left), with the heart rate agreeing with that measured by a smart watch (right).

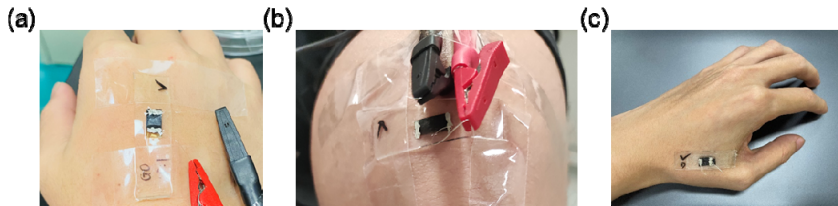

**Figure S6.** The photos showing the sensor adhered on the back of the hand (a), at the knee joint (b) and on the first dorsal interosseus muscle on hand (c).
